# Supplementary material for: Defect-engineered WSxSe2−x nanocrystals anchored on selenized polyacrylonitrile fibers toward high-performance sodium/potassium-ion batteries with a wide working temperature range
Source: Royal Society of Chemistry journal article supplement (doi:10.1039/d3qi02640j), 2024-01-01
Supplement: d3qi02640j1.pdf [file d3qi02640j1.pdf]

## Electronic Supplementary Information

### **Defect-engineered $WS_xSe_{2-x}$ nanocrystals anchored on the selenized polyacrylonitrile fibers toward high-performance sodium/potassium-ion batteries with wide temperature workability**

Fuyu Xiao<sup>a+</sup>, Jingran Zhang<sup>a+</sup>, Weiming Zhou<sup>\*a</sup>, Yixing Fang<sup>\*a</sup>, Xiaotong He<sup>a</sup>, Wenbin Lai<sup>a</sup>, Chuyuan Lin<sup>a</sup>, Mingyang Ge<sup>a</sup>, Haosen Fan<sup>\*b</sup>, Qingrong Qian<sup>a, c</sup>, Mingdeng Wei<sup>d</sup>, Qinghua Chen<sup>a, c</sup> and Lingxing Zeng<sup>\*a, c</sup>

<sup>a</sup> *Engineering Research Center of Polymer Green Recycling of Ministry of Education, Fujian Key Laboratory of Pollution Control & Resource Reuse, College of Environment and Resources, Fujian Normal University, Fuzhou, Fujian 350007, China. Email: zhouweiming721@126.com; fyx1993ustb@163.com; zenglingxing@fjnu.edu.cn*

<sup>b</sup> *College of Materials Science and Metallurgy Engineering, Guizhou University, Guiyang 550025, China. Email: hsfan@gzhu.edu.cn*

<sup>c</sup> *Key Laboratory of Advanced Energy Materials Chemistry (Ministry of Education), College of Chemistry, Nankai University, Tianjin 300071, China.*

<sup>d</sup> *Fujian Provincial Key Laboratory of Electrochemical Energy Storage Materials, Fuzhou University, Fuzhou, Fujian 350002, China.*

+ *These authors contributed equally to this work.*

## Experimental Section

### Synthesis of the $WS_xSe_{2-x}-Se@PAN$

Typically, polyacrylonitrile (PAN, 0.9 g,  $M_w=150\ 000$ , Sigma-Aldrich) and ammonium tetrathiotungstate ( $(NH_4)_2WS_4$ , 0.6 g, Sigma-Aldrich) were dissolved in 10 mL of N, N-dimethylformamide (DMF, 10 mL, A.R, Sinopharm Group Chemical Reagent Co., Ltd.) under stirring for 48 h at room temperature to a homogeneous solution. The solution was electrospun at 20 kV with a temperature of 40 °C. Then, the as-obtained electrospun fibres and selenium powder (A.R, Sinopharm Group Chemical Reagent Co. Ltd.) (w/w=1:1.5) were immersed and sonicated into carbon disulfide solution for 1 h. Finally, the precursor was calcined at 350 °C under 5%  $H_2/95\%$  Ar atmosphere for 5 h at a ramp rate of 2 °C  $min^{-1}$  and then was continued to rise to 450 °C and maintained for 5h to acquire the  $WS_xSe_{2-x}-Se@PAN$  composite (denoted as  $WSSe-xSe@PAN-2$ ). For comparison, the  $WSSe-xSe@PAN-1$  and  $WSSe-xSe@PAN-3$  samples were synthesized *via* the same procedure by mixing the as-obtained electrospun fibers and selenium powder in different proportions with 1:1 and 1:2, respectively.

### Material characterization

The scanning electron microscope (SEM, Hitachi 4800) and transmission electron microscope (TEM, FEI F20 S-TWIN) were used to study the microstructures of electrode materials. X-ray diffraction (XRD) patterns were collected on a Bruker D8 diffractometer (Germany) using a Cu  $K\alpha$  source in the range of 5-70°. FTIR spectroscopy and Raman spectra were examined on a DXR2xi (a diode laser of

excitation of 532 nm) and Thermo Scientific Nicolet iS10, respectively. Room temperature Electron paramagnetic resonance (EPR) spectra were collected on a MS 5000 spectrometer. The chemical states of the samples were recorded by X-ray photoelectron spectrometer (XPS) on an ESCALAB MARK II spherical analyzer.

### **Electrochemical measurements**

The electrochemical performance of Na/K-ion storage of all the electrodes were investigated by CR2032-type coin cells, which used pure sodium/potassium metal sheet as the counter/reference electrodes, the glass fiber film (Whatman GF/D) as separator. For the preparation of electrodes, active materials, super P and carboxymethyl cellulose binder (8:1:1 by weight) were milled together in deionized water to form uniform slurry. Then, the slurry was painted on a copper foil and dried at 80 °C in a vacuum for 12 h to obtain the working electrodes. The mass loading of the active material on each copper foil was typically about 1.0-1.5 mg cm<sup>-2</sup>. 1.0 M NaPF<sub>6</sub> in EC/DMC/EMC (1:1:1, vol) with 5% FEC and 7.0 M KFSI in 100% DME were used as the electrolytes, respectively, for SIBs and PIBs. Furthermore, Sodium-ion full cell was assembled with Na<sub>3</sub>V<sub>2</sub>(PO<sub>4</sub>)<sub>3</sub> as cathode and as anode, Full cell assembly is similar to half-cell assembly, the WSSe-Se@PAN-2 (anode) and Na<sub>3</sub>V<sub>2</sub>(PO<sub>4</sub>)<sub>3</sub> (cathode) is in the weight ratio of 1: 1.2, where the WSSe-Se@PAN-2 anode was presodiated for several cycles until the CE reached up to 95% before assembling full cells. Then they were coupled to fabricate the SIBs full cell in glove box. A LAND CT 2001A battery tester system was employed for investigating the galvanostatic charge/discharge performance, rate capabilities, and cycle performance with a voltage range of 0.01-3 V. Before the half-

cell wide temperature range performance test, the battery was pre-cycled 5 times at room temperature. A Ivium-n-Stat electrochemical workstation was used for testing the electrochemical impedance spectroscopy (EIS) (at a voltage amplitude 1.0 mV, and the frequency ranges from  $10^{-1}$  Hz to  $10^5$  Hz).

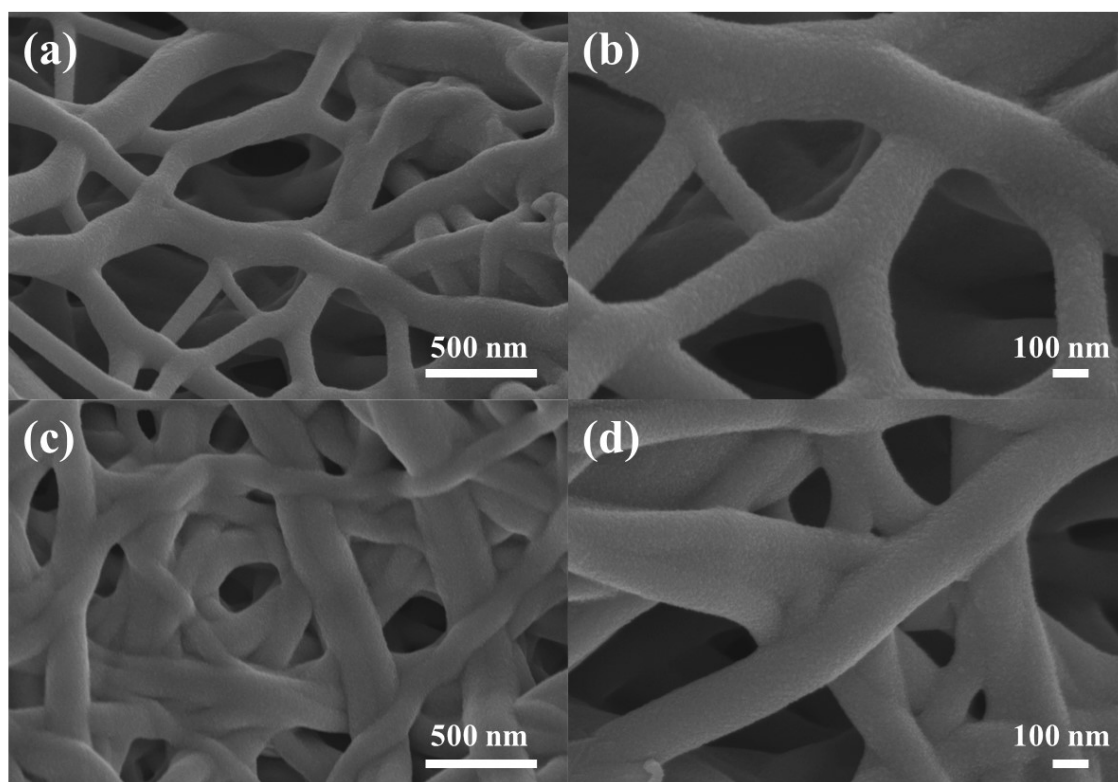

**Figure S1** SEM images of (a and b) WSSe-Se@PAN-1 and (c and d) WSSe-Se@PAN-3.

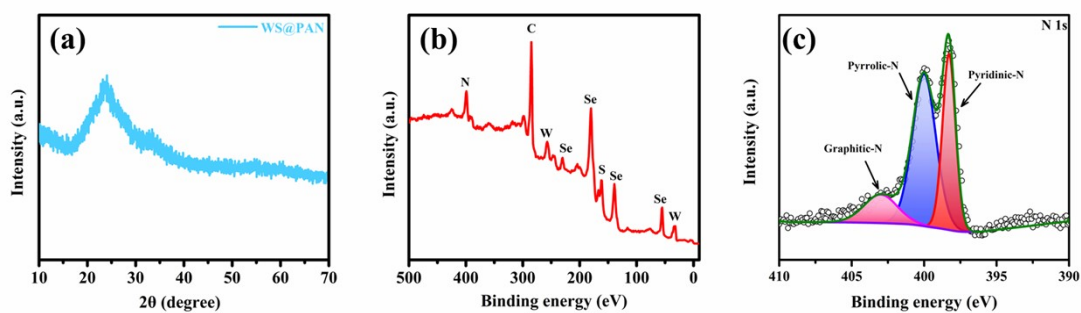

**Figure S2** (a) XRD pattern of WS@PAN; XPS spectra of WSSe-Se@PAN-2: (b) survey spectrum and (c) N 1s.

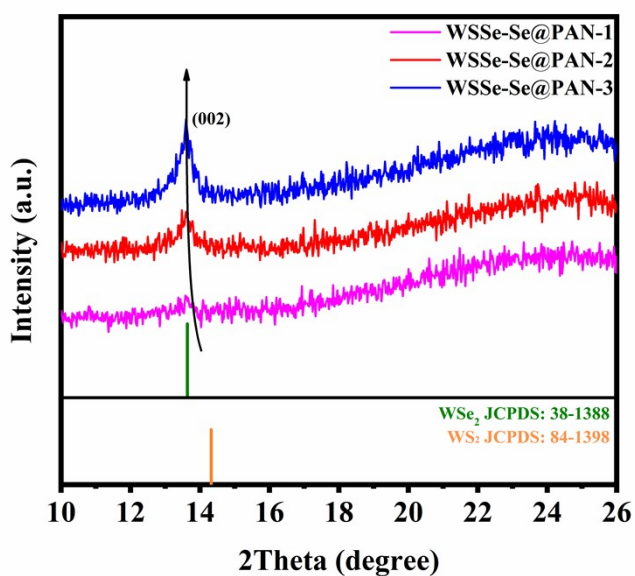

**Figure S3** The XRD patterns of WSSe-Se@PAN-1, WSSe-Se@PAN-2 and WSSe-Se@PAN-3 between 10° and 26°.

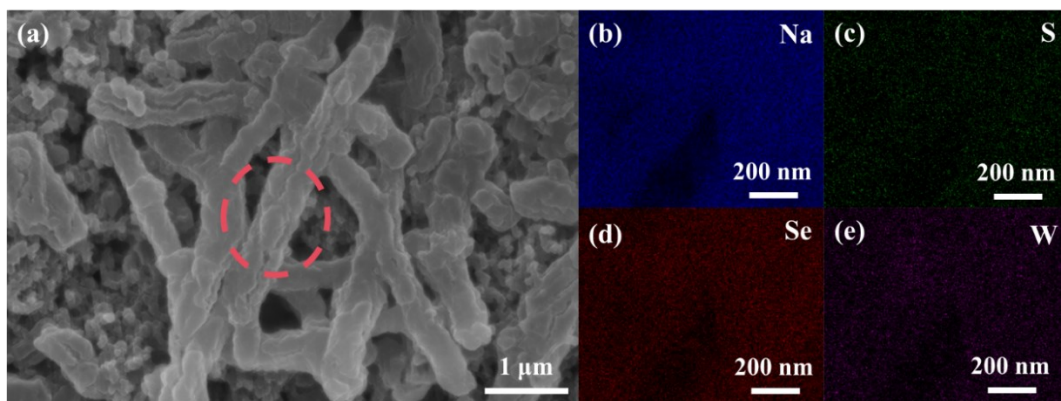

**Figure S4** (a) The SEM image and (b) elemental mapping results of WSSe-Se@PAN-2 after 200 cycles test at  $2 \text{ A g}^{-1}$  for Na (blue), S (green), Se (red), W (purple).

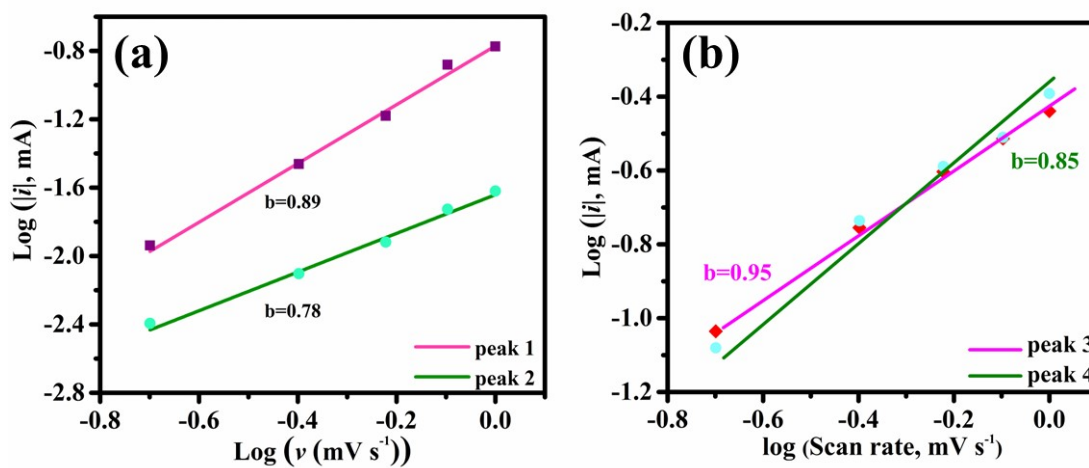

**Figure S5** Log( $i$ ) versus log( $v$ ) plots at different oxidation and reduction peaks for (a) sodium ion batteries and (b) potassium-ion batteries, respectively.

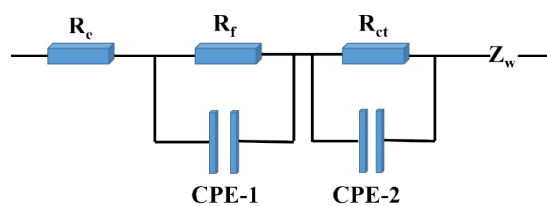

**Fig. S6** the equivalent circuit for describing the EIS behavior of the studied system.

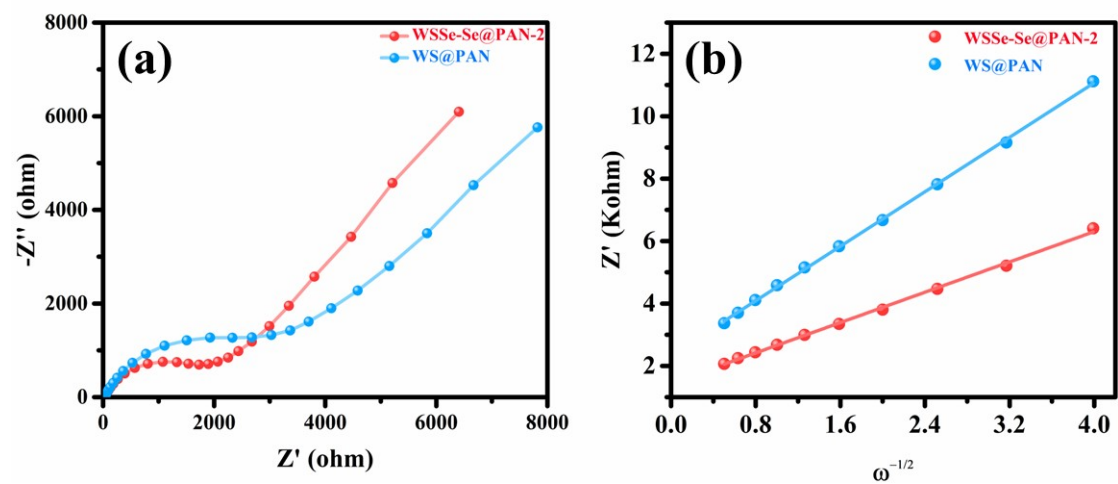

**Figure S7** (a) EIS plots and (b) the relationship between  $Z_{re}$  and  $\omega^{-1/2}$  for WSSe-Se@PAN-2, and WS@PAN electrodes for potassium-ion batteries, respectively.



**Table S1** Impedance parameters calculated from an equivalent circuit model.

| sample        | $R_e$ ( $\Omega$ ) | $R_f$ ( $\Omega$ ) | $R_{ct}$ ( $\Omega$ ) | $R_{total}$ ( $\Omega$ ) |
|---------------|--------------------|--------------------|-----------------------|--------------------------|
| WSSe-Se@PAN-1 | 6.3                | 143.1              | 315.0                 | 464.4                    |
| WSSe-Se@PAN-2 | 5.4                | 24.8               | 234.6                 | 264.8                    |
| WSSe-Se@PAN-3 | 6.4                | 99.0               | 382.1                 | 487.5                    |
| WS@PAN        | 6.7                | 141.3              | 546.7                 | 694.7                    |

**Table S2** The electrochemical rate performance of the related works of tungsten-based chalcogenides electrodes for sodium-ion batteries.

| Electrode materials                                             | Current density ( $A\ g^{-1}$ ) | Rate capability ( $mA\ h\ g^{-1}$ ) | Ref.             |
|-----------------------------------------------------------------|---------------------------------|-------------------------------------|------------------|
| WS <sub>2</sub> /NC                                             | 2.0                             | 238.1                               | [S1]             |
| WS <sub>2</sub> nanosheets                                      | 5.0                             | 211.4                               | [S2]             |
| H-WS <sub>2</sub> @NC                                           | 8.0                             | 254                                 | [S3]             |
| DODA-WS <sub>2</sub> nanofibers                                 | 10                              | 91                                  | [S4]             |
| metallic WS <sub>2</sub> hollow microspheres                    | 1.0                             | 307.7                               | [S5]             |
| WS <sub>2</sub> @S/N-C                                          | 30                              | 192                                 | [S6]             |
| PVD-deposited vertical WS <sub>2</sub> /C                       | 2.0                             | 70                                  | [S7]             |
| WS <sub>2</sub> @NC                                             | 5.0                             | 151                                 | [S8]             |
| VA/LT-WS <sub>2</sub> /C                                        | 5.0                             | 103.8                               | [S9]             |
| NB FeS <sub>2</sub> /WS <sub>2</sub> -CNFs                      | 8.0                             | 251.5                               | [S10]            |
| WS <sub>2-x</sub> /ZnS@C                                        | 20                              | 181.9                               | [S11]            |
| PCS/WS <sub>2</sub> /NG                                         | 2.0                             | 205.6                               | [S12]            |
| H-WS <sub>2</sub>                                               | 5.0                             | 236.7                               | [S13]            |
| 1T W <sub>0.9</sub> Mo <sub>0.1</sub> S <sub>2</sub> nanoplates | 5.0                             | 245                                 | [S14]            |
| HB WS <sub>2</sub> @CNFs                                        | 8.0                             | 182.4                               | [S15]            |
| WS <sub>2</sub> -SPAN                                           | 10                              | 270                                 | [S16]            |
| Ni-WS <sub>2</sub> /GO                                          | 20                              | 127                                 | [S17]            |
| <b>WS<sub>x</sub>Se<sub>2-x</sub>-Se@PAN</b>                    | <b>10</b>                       | <b>304</b>                          | <b>This work</b> |

**Table S3** Comparison of the electrochemical performance of the related literatures with wide-temperature workability.

| Electrode Materials                          | Field       | Temperature (°C) | Current density (A g <sup>-1</sup> ) | Cycling capability (mAh g <sup>-1</sup> ) | Cycles      | Ref.             |
|----------------------------------------------|-------------|------------------|--------------------------------------|-------------------------------------------|-------------|------------------|
| NbSSe                                        | SIBs        | 0                | 0.03                                 | 136                                       | 500         | [S18]            |
| F-CuFeS <sub>2</sub> @RGO                    | SIBs        | -20              | 1                                    | 375                                       | 200         | [S19]            |
|                                              |             | -40              | 1                                    | 182                                       | 200         |                  |
| FeS <sub>0.5</sub> Se <sub>0.5</sub> @NC     | SIBs        | 0                | 1                                    | 380.1                                     | 200         | [S20]            |
| SnSe <sub>2</sub> -SePAN                     | SIBs        | -15              | 0.5                                  | 300                                       | 700         | [S21]            |
|                                              |             | 60               | 0.5                                  | 352                                       | 100         |                  |
| Bi                                           | SIBs        | -20              | 0.4                                  | 295                                       | 300         | [S22]            |
|                                              |             | 60               | 0.4                                  | 293.6                                     | 100         |                  |
| <b>WS<sub>x</sub>Se<sub>2-x</sub>-Se@PAN</b> | <b>SIBs</b> | <b>50</b>        | <b>1</b>                             | <b>313</b>                                | <b>1000</b> | <b>This work</b> |
|                                              |             | <b>-15</b>       | <b>1</b>                             | <b>76</b>                                 | <b>1000</b> |                  |

**Table S4** The electrochemical performance of the related works of tungsten-based chalcogenides electrodes for potassium-ion batteries.

| <b>Electrode materials</b>                   | <b>Current density (A g<sup>-1</sup>)</b> | <b>Cycling capability (mA h g<sup>-1</sup>)</b> | <b>Cycles</b> | <b>Ref.</b>      |
|----------------------------------------------|-------------------------------------------|-------------------------------------------------|---------------|------------------|
| V <sub>S</sub> -WS <sub>2</sub> -SeNS        | 0.1                                       | 329                                             | 50            | [S23]            |
| C-WS <sub>2</sub> @CNFs                      | 0.1                                       | 312                                             | 100           | [S24]            |
| Commercial WS <sub>2</sub> powders           | 0.1                                       | 103                                             | 100           | [S25]            |
| S <sub>v</sub> -WS <sub>2</sub>              | 0.1                                       | 231                                             | 50            | [S26]            |
| WSe <sub>2</sub> @N-doped C                  | 0.1                                       | 302                                             | 120           | [S27]            |
| WSNC                                         | 0.1                                       | 384                                             | 200           | [S28]            |
| 1T-WSe <sub>2</sub> -Sn                      | 0.1                                       | 345                                             | 50            | [S29]            |
| SP-K <sub>x</sub> WSe <sub>2</sub>           | 0.1                                       | 383                                             | 1000          | [S30]            |
| <b>WS<sub>x</sub>Se<sub>2-x</sub>-Se@PAN</b> | <b>0.1</b>                                | <b>466</b>                                      | <b>100</b>    | <b>This work</b> |

## References

- S1 Y. Liu, H. Wei, C. Wang, F. Wang, H. Wang, W. Zhang, X. Wang, C. Yan, B. H. Kim and F. Ren, Nitrogen-doped carbon coated WS<sub>2</sub> nanosheets as anode for high-performance sodium-ion batteries, *Front. Chem.*, 2018, **6**, 236-244.
- S2 Y. Wang, D. Kong, S. Huang, Y. Shi, M. Ding, Y. Von Lim, T. Xu, F. Chen, X. Li and H. Y. Yang, 3D carbon foam-supported WS<sub>2</sub> nanosheets for cable-shaped flexible sodium ion batteries, *J. Mater. Chem. A*, 2018, **6**, 10813-10824.
- S3 X. Hu, Y. Liu, J. Li, G. Wang, J. Chen, G. Zhong, H. Zhan and Z. Wen, Self-assembling of conductive interlayer-expanded WS<sub>2</sub> nanosheets into 3d hollow hierarchical microflower bud hybrids for fast and stable sodium storage, *Adv. Funct. Mater.*, 2019, **30**, 1907677-1907689.
- S4 X. Xu, X. Li, J. Zhang, K. Qiao, D. Han, S. Wei, W. Xing and Z. Yan, Surfactant assisted electrospinning of WS<sub>2</sub> nanofibers and its promising performance as anode material of sodium-ion batteries, *Electrochim. Acta*, 2019, **302**, 259-269.
- S5 J. Wang, L. Yu, Z. Zhou, L. Zeng and M. Wei, Template-free synthesis of metallic WS<sub>2</sub> hollow microspheres as an anode for the sodium-ion battery, *J. Colloid Interf. Sci.*, 2019, **557**, 722-728.
- S6 X. Li, Y. Sun, X. Xu, Y.-X. Wang, S.-L. Chou, A. Cao, L. Chen and S.-X. Dou, Lotus rhizome-like S/N-C with embedded WS<sub>2</sub> for superior sodium storage, *J. Mater. Chem. A*, 2019, **7**, 25932-25943.
- S7 P. Li, Y. Wang, J. Y. Jeong, X. Gao, K. Zhang, A. Neville, S. Xu and J. H. Park, Vertically constructed monolithic electrodes for sodium ion batteries: toward low tortuosity and high energy density, *J. Mater. Chem. A*, 2019, **7**, 25985-25992.
- S8 Y. V. Lim, Y. Wang, D. Kong, L. Guo, J. I. Wong, L. K. Ang and H. Y. Yang, Cubic-shaped WS<sub>2</sub> nanopetals on a prussian blue derived nitrogen-doped carbon nanoporous framework for high performance sodium-ion batteries, *J. Mater. Chem. A*, 2017, **5**, 10406-10415.
- S9 S. Xu, X. Gao, Y. Hua, A. Neville, Y. Wang and K. Zhang, Rapid deposition of WS<sub>2</sub> platelet thin films as additive-free anode for sodium ion batteries with superior volumetric capacity, *Energy Storage Mater.*, 2020, **26**, 534-542.
- S10 H. Wu, N. Xu, Z. Jiang, A. Zheng, Q. Shi, R. Lv, L. Ni, G. Diao and M. Chen, Space and interface confinement effect of necklace-box structural FeS<sub>2</sub>/WS<sub>2</sub> carbon nanofibers to enhance Na<sup>+</sup> storage performance and electrochemical kinetics, *Chem. Eng. J.*, 2022, **427**, 131002-131012.
- S11 Y. Li, J. Qian, M. Zhang, S. Wang, Z. Wang, M. Li, Y. Bai, Q. An, H. Xu, F. Wu, L. Mai and C. Wu, Co-construction of sulfur vacancies and heterojunctions in tungsten disulfide to induce fast electronic/ionic diffusion kinetics for sodium-ion batteries, *Adv. Mater.*, 2020, **32**, e2005802.
- S12 T. Li, R. Guo, Y. Luo, F. Li, L. Meng, X. Sun, Z. Yang, H. Luo and Y. Wan, Improved lithium and sodium ion storage properties of WS<sub>2</sub> anode with three-layer shell structure, *Electrochim. Acta*, 2020, **331**, 135424-135437.
- S13 X. Luo, J. Huang, Y. Huang, L. Cao, J. Li, Y. Wang, Z. Xu, S. Wei and K. Kajiyoshi, Self-templated induced carbon-supported hollow WS<sub>2</sub> composite structure for high-performance sodium storage, *J. Mater. Chem. A*, 2021, **9**, 21366-21378.
- S14 H. Tao, J. Li, J. Li, Z. Hou, X. Yang and L.-Z. Fan, Metallic phase W<sub>0.9</sub>Mo<sub>0.1</sub>S<sub>2</sub> for high-performance anode of sodium ion batteries through suppressing the

- dissolution of polysulfides, *J. Energy Chem.*, 2022, **66**, 356-365.
- S15 H. Wu, X. Chen, C. Qian, H. Yan, C. Yan, N. Xu, Y. Piao, G. Diao and M. Chen, Confinement growth of layered WS<sub>2</sub> in hollow beaded carbon nanofibers with synergistic anchoring effect to reinforce Li<sup>+</sup>/Na<sup>+</sup> storage performance, *Small*, 2020, **16**, e2000695.
- S16 Z. Lei, J. Zheng, X. He, Y. Wang, X. Yang, F. Xiao, H. Xue, P. Xiong, M. Wei, Q. Chen, Q. Qian and L. Zeng, Defect-rich WS<sub>2</sub>-SPAN nanofibers for sodium/potassium-ion batteries: ultralong lifespans and wide-temperature workability, *Inorg. Chem. Front.*, 2023, **10**, 1187-1196.
- S17 X. Luo, J. Huang, L. Cao, J. Li, Z. Xu, K. Kajiyoshi, Y. Zhao, H. Yang, Y. Liu and Z. Li, Constructing multi-dimensional migration channel by nickel-doped WS<sub>2</sub> composite: High speed sodium and potassium ion storage kinetics in WS<sub>2</sub> nanosheets, *Chem. Eng. J.*, 2023, **464**, 142579-142590.
- S18 Zhou, L.-F.; Gao, X.-W.; Du, T.; Gong, H.; Liu, L.-Y.; Luo, W.-B. Two-dimensional NbSSe as anode material for low-temperature sodium-ion batteries. *Chem. Eng. J.*, 2022, **435**, 134838-134844.
- S19 G. Sun, H. Lin, R. Tian, Z. Wei, X. Wang, X. Jin, S. Yao, G. Chen, Z. Shen and F. Du, Rational design and synthesis of nanosheets self-assembled hierarchical flower-ball-like CuFeS<sub>2</sub> for boosted wide temperature sodium-ion batteries, *Nano Res.*, 2023, **16**, 9407-9415.
- S20 Y. Wang, Y. Liu, Q. Li, Z. Li, A. Xu, C. Dong, J. Sun, X. Zhang, X. Sun, J. Yang, F. Jiang and Y. Zhou, New dual-anions FeS<sub>0.5</sub>Se<sub>0.5</sub>@NC porous nanorods as advanced electrode materials for wide-temperature sodium-ion half/full batteries, *Appl. Surf. Sci.*, 2023, **620**, 156836-156845.
- S21 Y. Wang, F. Xiao, X. Chen, P. Xiong, C. Lin, H. Wang, M. Wei, Q. Qian, Q. Chen, L. Zeng, Extraordinarily stable and wide temperature range sodium/potassium-ion batteries based on 1D SnSe<sub>2</sub>-SePAN composite nanofibers, *InfoMat*, 2023, **5**, 12467.
- S22 J. Zhou, Y. Ding, Y. Wang, H. Li, J. Shang, Y. Cao and H. Wang, Bulk bismuth anodes for wide-temperature sodium-ion batteries enabled by electrolyte chemistry modulation, *J. Colloid Interf. Sci.*, 2024, **657**, 502-510.
- S23 Q. Zhu, W. Li, J. Wu, N. Tian, Y. Li, J. Yang and B. Liu, Filling selenium into sulfur vacancies in ultrathin tungsten sulfide nanosheets for superior potassium storage, *ACS Appl. Mater. interfaces*, 2022, **14**, 51994-52006.
- S24 S. Geng, T. Zhou, M. Jia, X. Shen, P. Gao, S. Tian, P. Zhou, B. Liu, J. Zhou, S. Zhuo and F. Li, Carbon-coated WS<sub>2</sub> nanosheets supported on carbon nanofibers for high-rate potassium-ion capacitors, *Energy Environ. Sci.*, 2021, **14**, 3184-3193.
- S25 Y. Wu, Y. Xu, Y. Li, P. Lyu, J. Wen, C. Zhang, M. Zhou, Y. Fang, H. Zhao, U. Kaiser and Y. Lei, Unexpected intercalation-dominated potassium storage in WS<sub>2</sub> as a potassium-ion battery anode, *Nano Res.*, 2019, **12**, 2997-3002.
- S26 Q. Zhu, W. Li, J. Wu, N. Tian, Y. Li, J. Yang, B. Liu and J. Jiang, Vacancy engineering in WS<sub>2</sub> nanosheets for enhanced potassium - ion storage, *J. Power Sources*, 2022, **542**, 231791-231801.
- S27 X. Chen, H. Muheiyati, X. Sun, P. Zhou, P. Wang, X. Ding, Y. Qian and L. Xu, Rational design of tungsten selenide@N-doped carbon nanotube for high-stable potassium-ion batteries, *Small*, 2022, **18**, e2104363.
- S28 L. Xing, K. Han, Q. Liu, Z. Liu, J. Chu, L. Zhang, X. Ma, Y. Bao, P. Li and W. Wang, Hierarchical two-atom-layered WSe<sub>2</sub>/C ultrathin crumpled nanosheets

- assemblies: Engineering the interlayer spacing boosts potassium-ion storage, *Energy Storage Mater.*, 2021, **36**, 309-317.
- S29 Y.-R. Liu, Z.-W. Lei, R.-P. Liu, X.-Y. Li, P.-X. Xiong, Y.-J. Luo, Q.-H. Chen, M.-D. Wei, L.-X. Zeng and Q.-R. Qian, Sn-doped induced stable 1T-WSe<sub>2</sub> nanosheets entrenched on N-doped carbon with extraordinary half/full sodium/potassium storage performance, *Rare Met.*, 2023 **42**, 1557-1569
- S30 Z. Zhao, T. Xu and X. Yu, Unlock the potassium storage behavior of singlephased tungsten selenide nanorods via large cation insertion, *Adv. Mater.*, 2022, **35**, 2208096-2208106.
